# Supplementary material
Source: Springer Nature journal article supplement (https://www.springermedizin.de/resource/supplementary/12936_2013_3064_MOESM6_ESM.pdf/9545022)
Supplement: MOESM6 [file 9545022]

# Unit Costs (per tablet) of Artemether + Lumefantrine - FDC over Time

Unit cost (per tablet) in USD

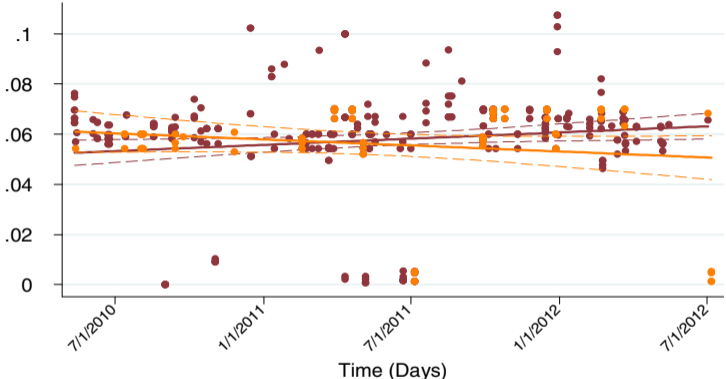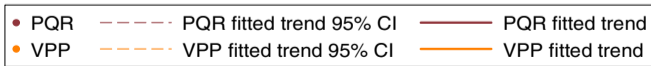

PQR Coef.=.000 (P=.023)

PQR vs VPP (fitted trends) P=.273

VPP Coef.=-.000 (P=.164)
